# Supplementary material
Source: MDPI journal article supplement (https://www.mdpi.com/2073-4352/6/10/136)

# Supporting Information: Stable Photocatalytic Paints Prepared from Hybrid Core-Shell Fluorinated/Acrylic/TiO<sub>2</sub> Waterborne Dispersions

Audrey Bonnefond, Edurne González, José M. Asua, Jose Ramon Leiza, Eliana Ieva, Giulio Brinati, Serena Carella, Alessio Marrani, Alessandro Veneroni, John Kiwi, Cesar Pulgarin, Sami Rtimi

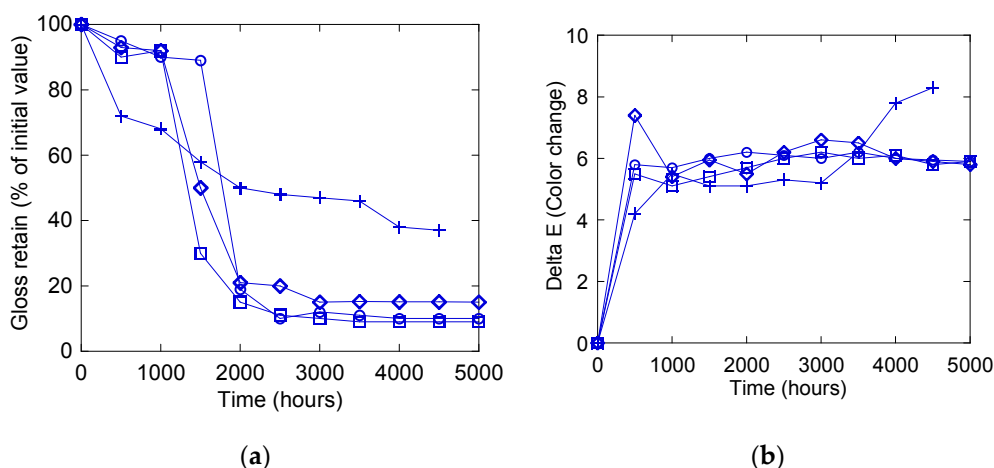

**Figure S1.** (a) Gloss retain and (b) color change after UV-B exposure of the different coated panels for samples + CS2, o CS2+P25 (1 wbp%), □ CS2+ P25 (5 wbp%), and ◇ CS2+ P25 (10 wbp%).

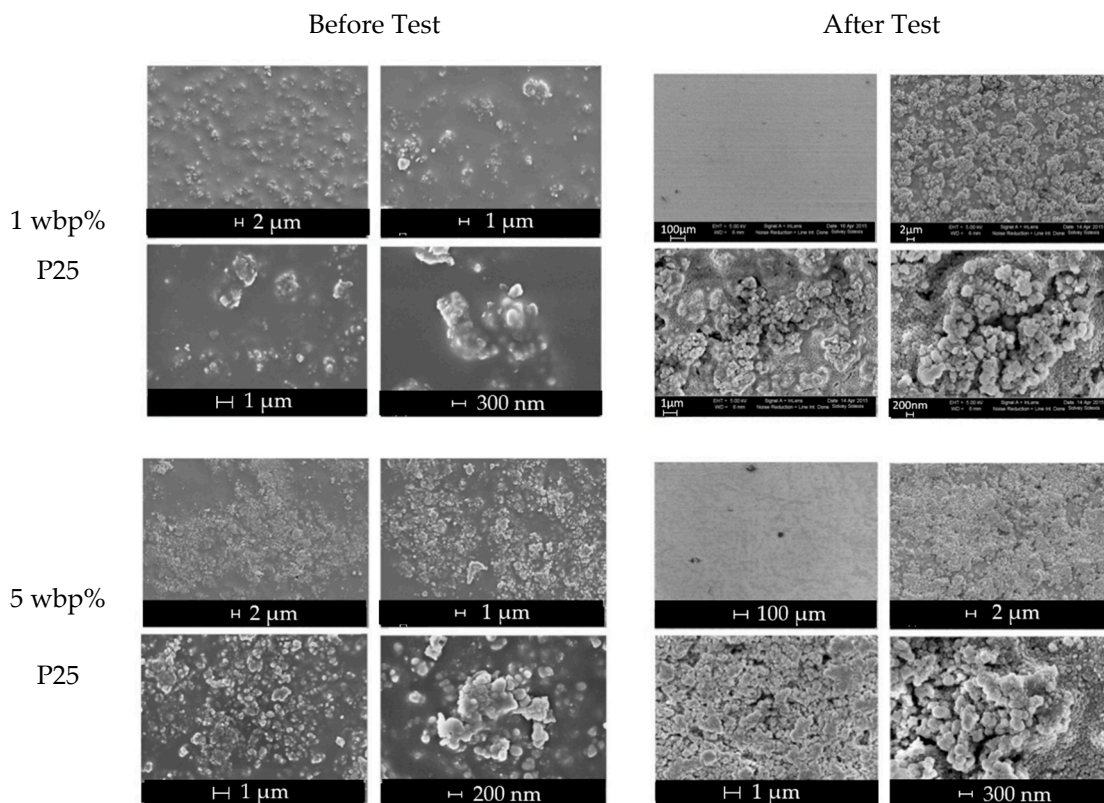

**Figure S2.** SEM micrographs of the surface of the panels coated with formulated paints containing CS2 + P25 as a binder before and after the weathering tests.

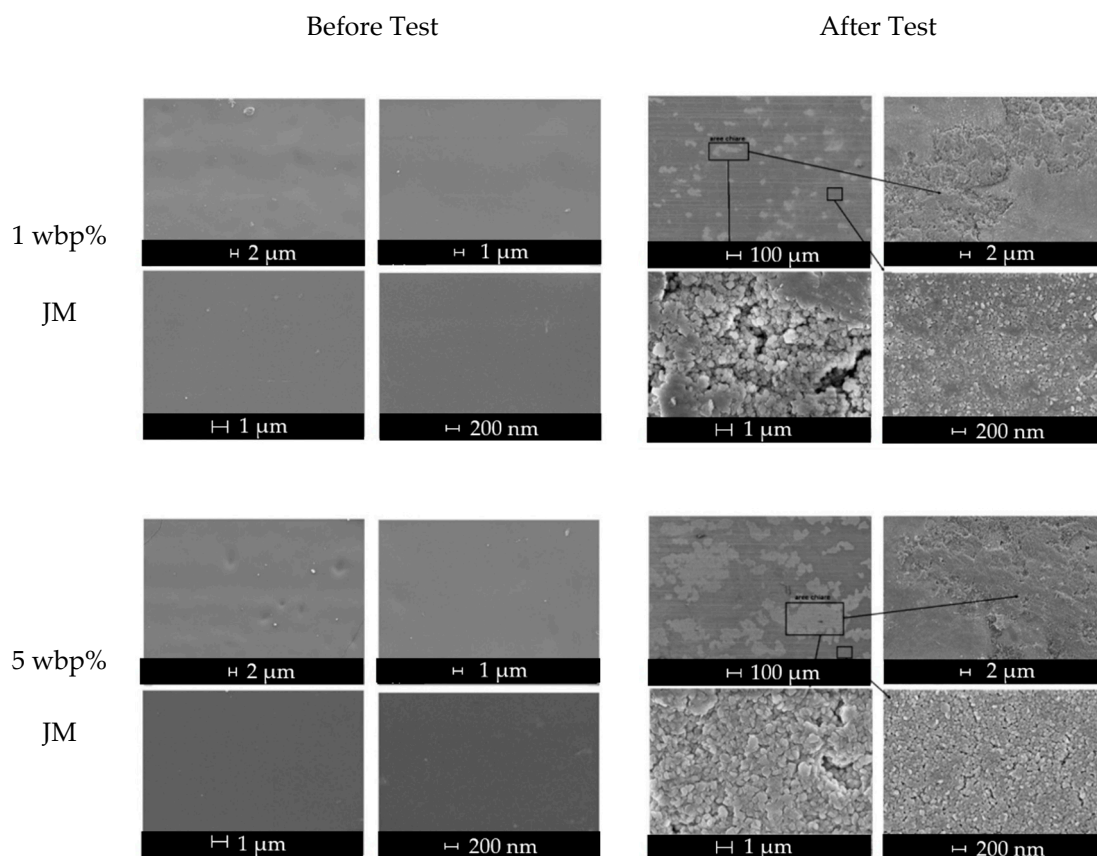

**Figure S3.** SEM micrographs of the surface of the panels coated with non-pigmented paints containing CS2 + JM as a binder before and after the weathering tests.

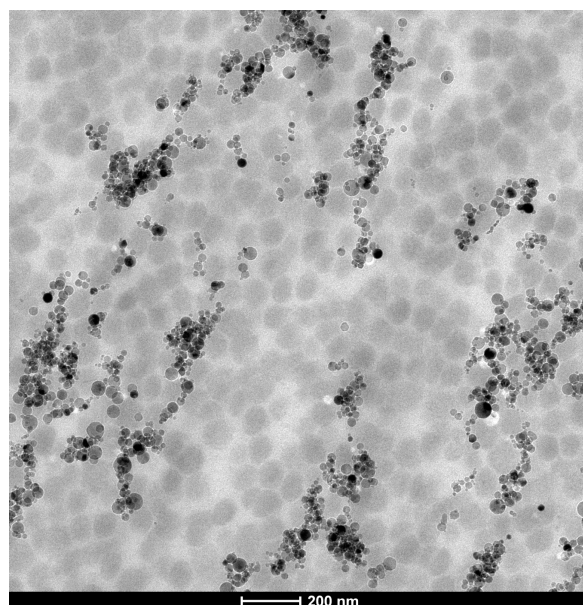

**Figure S4.** TEM micrographs of the cross-sections of the film obtained by casting the blend CS2 + JM containing 10 wbp% TiO<sub>2</sub>.

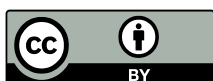

Supplement: s1 [file s1]
